# Supplementary material
Source: PubMed Central journal article supplement (PMC1422757)
Supplement: bj3950345add.pdf [file bj3950345add.pdf]

## SUPPLEMENTARY SECTION

### Treatment of the ultracentrifugation data

In the program Sedfit, a large number of discrete, independent species, for which a relationship between mass and sedimentation ( $s$ ) and diffusion ( $D$ ) coefficients is assumed, is considered to represent a continuous distribution [37]. It should be mentioned that an inadequate relationship between  $s$  and  $D$  only decreases the resolution of the distribution. Sedfit also takes advantage of a radial and time-independent noise subtraction procedure [37].

The normalized sedimentation coefficients  $s_{20,w}^0$  were calculated from  $s$  with:

$$s_{20,w}^0 = s [(1-\rho_{20,w}^0 \bar{v}_{PDC}) / (1-(1-\rho \bar{v}_{PDC}) \bar{v}_{PDC})] (\eta/\eta_{20,w}^0) \quad (\text{Equation 1})$$

The density and viscosity of water at 20 °C are  $\rho_{20,w}^0 = 0.99828$  g/ml and  $\eta_{20,w}^0 = 1.002$  cP, respectively. The partial specific volume of the complex,  $\bar{v}_{PDC}$ , used for the calculation of  $s_{20,w}^0$  is:

$$\bar{v}_{PDC} = (\bar{v}_P + \delta_D \bar{v}_D + \delta_L \bar{v}_L + \delta_w \bar{v}_w) / (1 + \delta_D + \delta_L + \delta_w) \quad (\text{Equation 2})$$

$\delta_D$ ,  $\delta_L$  and  $\delta_w$ , are the amounts in gram of detergent, lipids and water hydration, respectively, per gram of protein, and  $\bar{v}_P$ ,  $\bar{v}_D$ ,  $\bar{v}_L$  and  $\bar{v}_w$  are the partial specific volumes of the constituents.  $\delta_D$  and  $\delta_L$  have been determined experimentally;  $\delta_w$  is assumed to be 0.3 g/g.

The Svedberg equation relates the experimental  $s$  value to the buoyant molar mass of the complex,  $M_{bPDC}$ , and its Stoke radius  $R_S$ :

$$M_{bPDC} = s N_A 6 \pi \eta R_S \quad (\text{Equation 3})$$

where  $N_A$  is Avogadro's number.

The value of the buoyant molar mass depends on the solvent density but can also be expressed as a function of the molecular mass,  $M_P$ , of the protein in the BmrA-detergent complex, the quantity of bound detergent ( $\delta_D$ ), lipids ( $\delta_L$ ) and solvent ( $\delta_w$ ), and of  $\bar{v}_P$ ,  $\bar{v}_D$ ,  $\bar{v}_L$  and  $\bar{v}_w$ :

$$M_{bPDC} = M_P [(1-\rho \bar{v}_P) + \delta_D (1-\rho \bar{v}_D) + \delta_L (1-\rho \bar{v}_L) + \delta_w (1-\rho \bar{v}_w)] \quad (\text{Equation 4})$$

The molar mass of PDC,  $M_{PDC}$ , is given without hydration:

$$M_{PDC} = M_P (1 + \delta_D + \delta_L) \quad (\text{Equation 5})$$

The frictional ratio  $f/f^\circ$  relates the Stokes radius  $R_S$  to the minimum radius  $R^\circ$  of the non-hydrated particle:

$$R_S = f/f^\circ R^\circ \quad (\text{Equation 6})$$

$$R^\circ = [(3M_P(\bar{v}_P + \delta_D \bar{v}_D + \delta_L \bar{v}_L)) / (4\pi N_A)]^{1/3}$$

(Equation 7)
